# Supplementary material
Source: Springer Nature journal article supplement (https://www.springermedizin.de/resource/supplementary/13020_2008_46_MOESM6_ESM.pdf/9640862)

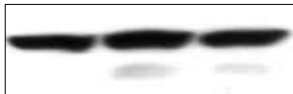

} FN

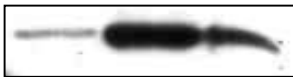

$\alpha 5\beta 1$

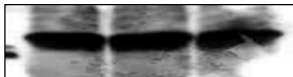

FAK

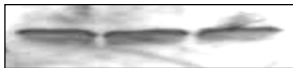

p-FAK

**Normal/Model/FZHY**

Supplement: MOESM6 [file 9640862]
